# Supplementary material for: Neurosymptomatic HIV-1 CSF escape is associated with replication in CNS T cells and inflammation
Source: PubMed Central journal article supplement (PMC11444166; doi:10.1172/jci176358), 2024-10-01
Supplement: jci-134-176358-s094.pdf [file jci-134-176358-s094.pdf]

Supplemental Table 1. Clinical symptoms and coinfections

| Clinical site          | PID         | Neurologic symptoms                                                                        | Imaging                                                                                                                                                    |                   | Coinfections examined                                                                                        |                                                                                                           |                   | Pre-ART viral loads (copies/ml) |       |                   |
|------------------------|-------------|--------------------------------------------------------------------------------------------|------------------------------------------------------------------------------------------------------------------------------------------------------------|-------------------|--------------------------------------------------------------------------------------------------------------|-----------------------------------------------------------------------------------------------------------|-------------------|---------------------------------|-------|-------------------|
|                        |             |                                                                                            | Notes                                                                                                                                                      | Relevant citation | Negative                                                                                                     | Positive                                                                                                  | Relevant citation | Plasma                          | CSF   | Relevant citation |
| San Francisco, CA, USA | 355         | Unsteady gait (myelopathy), cognitive impairment                                           | Not done                                                                                                                                                   | (13)              | A                                                                                                            | HHV6/6B <sup>B</sup>                                                                                      | (42)              |                                 |       |                   |
|                        | 978         | Aphasia, confusion & memory loss, personality change.                                      | Axial T2-weighted images show patchy central peripheral white matter signal abnormality                                                                    | (88)              | A                                                                                                            |                                                                                                           | (42)              |                                 |       |                   |
|                        | 1024        | Cognitive impairment, gait instability, ataxia, impulsiveness                              | FLAIR images demonstrate patchy peripheral white matter abnormality                                                                                        | (88)              | A                                                                                                            |                                                                                                           | (42)              |                                 |       |                   |
|                        | 1078        | Cognitive impairment                                                                       |                                                                                                                                                            |                   |                                                                                                              |                                                                                                           |                   |                                 |       |                   |
|                        | 818         | Cognitive impairment, personality change                                                   |                                                                                                                                                            |                   | A                                                                                                            |                                                                                                           | (42)              |                                 |       |                   |
|                        | 351         | Cognitive impairment, gait instability, leg spasticity                                     |                                                                                                                                                            |                   | A                                                                                                            |                                                                                                           | (42)              |                                 |       |                   |
| Pune, India            | 668         | Cognitive impairment                                                                       |                                                                                                                                                            |                   |                                                                                                              |                                                                                                           |                   |                                 |       |                   |
|                        | 3164        | Headache, gait instability, tremors, cognitive impairment                                  |                                                                                                                                                            |                   | HBV <sup>C</sup> , HCV <sup>C</sup> , Syphilis <sup>C</sup> , TB <sup>C</sup> , cryptococcus <sup>C, A</sup> | EBV <sup>B</sup> , HHV7 <sup>B</sup>                                                                      | (42)              |                                 |       |                   |
|                        | 3163        | Gait instability, tremors                                                                  |                                                                                                                                                            |                   | HBV <sup>C</sup> , HCV <sup>C</sup> , Syphilis <sup>C</sup> , TB <sup>C</sup> , cryptococcus <sup>C, A</sup> |                                                                                                           | (42)              |                                 |       |                   |
|                        | 3219        | Gait instability, tremors, cognitive impairment                                            |                                                                                                                                                            |                   | HBV <sup>C</sup> , HCV <sup>C</sup> , Syphilis <sup>C</sup> , TB <sup>C</sup> , cryptococcus <sup>C, A</sup> | EBV <sup>B</sup>                                                                                          | (42)              | 687,135                         |       |                   |
|                        | 3245        | Headache, gait instability, tremors                                                        |                                                                                                                                                            |                   | HBV <sup>C</sup> , HCV <sup>C</sup> , Syphilis <sup>C</sup> , TB <sup>C</sup> , cryptococcus <sup>C, A</sup> | EBV <sup>B</sup>                                                                                          | (42)              |                                 |       |                   |
|                        | 3309        | Headache, gait instability, tremors, cognitive impairment, seizures                        |                                                                                                                                                            |                   | HBV <sup>C</sup> , HCV <sup>C</sup> , Syphilis <sup>C</sup> , TB <sup>C</sup> , cryptococcus <sup>C, A</sup> | CMV <sup>B</sup> , EBV <sup>B</sup>                                                                       | (42)              |                                 |       |                   |
|                        | 3328        | Gait instability, tremors, cognitive impairment, incontinence                              |                                                                                                                                                            |                   | HBV <sup>C</sup> , HCV <sup>C</sup> , Syphilis <sup>C</sup> , TB <sup>C</sup> , cryptococcus <sup>C, A</sup> | EBV <sup>B</sup>                                                                                          | (42)              | 77,494                          |       |                   |
|                        | 3452        | Gait instability, tremors, cognitive impairment                                            |                                                                                                                                                            |                   | HBV <sup>C</sup> , HCV <sup>C</sup> , Syphilis <sup>C</sup> , TB <sup>C</sup> , cryptococcus <sup>C</sup>    |                                                                                                           |                   |                                 |       |                   |
|                        | 3313        | Gait instability, tremors, cognitive impairment                                            |                                                                                                                                                            |                   | HBV <sup>C</sup> , HCV <sup>C</sup> , Syphilis <sup>C</sup> , TB <sup>C</sup> , cryptococcus <sup>C, A</sup> |                                                                                                           | (42)              | 124,509                         |       |                   |
|                        | 3366        | Gait instability, cognitive impairment                                                     |                                                                                                                                                            |                   | HBV <sup>C</sup> , HCV <sup>C</sup> , Syphilis <sup>C</sup> , TB <sup>C</sup> , cryptococcus <sup>C</sup>    |                                                                                                           |                   | 42,993                          |       |                   |
|                        | 3320        | Headache, gait instability                                                                 |                                                                                                                                                            |                   | HBV <sup>C</sup> , HCV <sup>C</sup> , Syphilis <sup>C</sup> , TB <sup>C</sup> , cryptococcus <sup>C</sup>    |                                                                                                           |                   |                                 |       |                   |
|                        | Milan Italy | 1481                                                                                       | Headache, gait instability, tremors                                                                                                                        |                   |                                                                                                              | HBV <sup>C</sup> , HCV <sup>C</sup> , Syphilis <sup>C</sup> , TB <sup>C</sup> , cryptococcus <sup>C</sup> |                   |                                 |       |                   |
| 3201                   |             | Gait instability, tremors, cognitive impairment, paralysis of limb, incontinence, seizures |                                                                                                                                                            |                   | HBV <sup>C</sup> , HCV <sup>C</sup> , Syphilis <sup>C</sup> , TB <sup>C</sup> , cryptococcus <sup>C, A</sup> |                                                                                                           | (42)              |                                 |       |                   |
| 4947                   |             | Memory loss                                                                                | Normal MRI                                                                                                                                                 |                   | A                                                                                                            |                                                                                                           | (42)              | 21,015                          |       |                   |
| 7157                   |             | Headache, somnolence, dizziness                                                            | Oedema and T2 hyperintensity of the caudate, putamen, and lenticular nuclei and internal capsula, periventricular hyperintensity. No contrast enhancement. |                   | A                                                                                                            | EBV <sup>B</sup>                                                                                          | (42)              |                                 |       |                   |
| 9544                   |             | Tremor, ataxia, progressive cognitive decline, memory loss                                 | Leukoencephalopathy, atrophy                                                                                                                               |                   | A                                                                                                            |                                                                                                           | (42)              |                                 |       |                   |
| Torino, Italy          | Ca14        | Dizziness, severe gait abnormalities, tremors                                              | Abnormalities at the time of escape that improved over 9 months following ART optimization                                                                 | (89)              | CMV <sup>C</sup> , JCV <sup>C</sup> , HSV-1/2 <sup>C</sup>                                                   | EBV <sup>C</sup>                                                                                          | (89)              | 557,351                         | 2,545 | (89)              |
| Gothenburg, Sweden     | 9804        | Severe HIV encephalitis                                                                    |                                                                                                                                                            |                   | A                                                                                                            |                                                                                                           | (42)              | 150,000                         |       |                   |
|                        | 5168        | Cognitive decline                                                                          | Slight deformity of frontal ventricular horns, stable compared with previous examinations. Otherwise normal.                                               | (13)              | A                                                                                                            | EBV <sup>B</sup>                                                                                          | (42)              | 4,120                           |       |                   |

<sup>A</sup>Sample tested with global pathogen detection IDseq

<sup>B</sup>Pathogen identified with global pathogen detection IDseq method

<sup>C</sup>Pathogen tested for and/or identified by testing at the local clinical site

Information in this table with no reference listed was provided by the clinic that collected the sample

## Supplemental Table 2. Comparator cohorts

| Cohort                       | N  | Country of origin         | Sampling year range | On ART? | Neurosymptomatic? | Plasma HIV-1 RNA (cp/ml) median (IQR) | CSF HIV-1 RNA (cp/ml) median (IQR) | Blood CD4 (cells/ $\mu$ l) median (IQR) | CSF WBC (cells/ $\mu$ l) median (IQR) |
|------------------------------|----|---------------------------|---------------------|---------|-------------------|---------------------------------------|------------------------------------|-----------------------------------------|---------------------------------------|
| NSE                          | 25 | USA, India, Italy, Sweden | 2000-2019           | Yes     | Yes               | 86 (39-220)                           | 1700 (726-4,700)                   | 427 (380-660)                           | 14 (12-44)                            |
| Untreated, chronic infection | 7  | USA                       | 2012-2013           | No      | No                | 123,213 (43,883-167,727)              | 12,434 (4,487-35,606)              | 279 (215-368)                           | 7 (3-14)                              |
| Untreated, primary infection | 7  | USA                       | 2003-2009           | No      | No                | 367,728 (167,000-416,500)             | 15,200 (4,429-28,706)              | 705 (445-729)                           | 7 (4-19)                              |
| ASE                          | 2  | USA                       | 2013                | Yes     | No                | 39 (39-39)                            | 780 (523-1038)                     | 205 (203-208)                           | 46 (23-66)                            |
| ART-suppressed               | 49 | USA, Sweden               | 2006-2019           | Yes     | No                | 39 (39-39)                            | 39 (39-39)                         | 600 (440-784)                           | 1 (0-3)                               |

Supplemental Table 3. ART optimization and follow up visit information

| Subject ID | Initial NSE     |                            |                         |                          | ART Optimization      |                          |                   | NSE Follow up                               |                                  |                               |                                | Notes |                              |                       |
|------------|-----------------|----------------------------|-------------------------|--------------------------|-----------------------|--------------------------|-------------------|---------------------------------------------|----------------------------------|-------------------------------|--------------------------------|-------|------------------------------|-----------------------|
|            | Collection Date | NSE Plasma HIV RNA (cp/ml) | NSE CSF HIV RNA (cp/ml) | NSE Blood CD4 (cells/μl) | NSE CSF WBC (cell/μl) | Date of ART optimization | Date of follow up | Days between ART optimization and follow up | Follow up Plasma HIV RNA (cp/ml) | Follow up CSF HIV RNA (cp/ml) | Follow up Blood CD4 (cells/μl) |       | Follow up CSF WBC (cells/μl) | Did symptoms improve? |
| 355        | 3/10/00         | 378                        | 5467                    | 262                      | 47                    | 3/12/00                  | 4/7/00            | 26                                          | <40                              | 205                           | 372                            | 39    | Yes                          |                       |
| 978        | 3/18/13         | <40                        | 274                     | 545                      | 68                    | 4/9/13                   | 5/17/13           | 38                                          | <40                              | <40                           | 530                            | 14    | Yes                          |                       |
| 818        | 4/26/10         | 57                         | 1493                    | 438                      | 22                    | 7/1/11                   | 2/6/12            | 220                                         | <40                              | <40                           | 501                            | 9     | Yes                          |                       |
| 9544       | 1/20/15         | 86                         | 853                     | 733                      | 24                    | 1/23/15                  | 6/30/15           | 158                                         | <40                              | <40                           | 534                            | 1     | Yes                          |                       |
| Ca4        | 2/11/16         | 90                         | 7566                    | 784                      | 44                    | 2/16/16                  | 5/27/16           | 101                                         | <40                              | <40                           | N/A                            | N/A   | Yes                          |                       |
| 9804       | 10/16/14        | <40                        | 5182                    | 1310                     | 44                    | 11/22/14                 | 1/20/15           | 59                                          | <40                              | <40                           | N/A                            | N/A   | Yes                          |                       |
| 3163       | 11/12/17        | 390                        | 2100                    | 695                      | 5                     | 12/11/17                 | 7/10/18           | 211                                         | <40                              | <40                           | NA                             | NA    | Yes                          |                       |
| 3219       | 12/29/17        | 290                        | 1700                    | 322                      | 6                     | 12/29/17                 | 4/4/19            | 461                                         | 320                              | 5000                          | 266                            | N/A   | Yes                          |                       |
| 3201       | 1/1/18          | <20                        | 4700                    | 337                      | 6                     | 1/3/18                   | 6/3/18            | 151                                         | <40                              | <40                           | 607                            | N/A   | Yes                          |                       |
| 3309       | 4/7/18          | 470                        | 3100                    | 396                      | 31                    | 7/10/18                  | 6/4/19            | 329                                         | <40                              | <40                           | 887                            | N/A   | Yes                          |                       |
| 3313       | 11/7/18         | 140                        | 7100                    | 313                      | 13                    | 7/19/18                  | 10/13/18          | 86                                          | <40                              | <40                           | 389                            | N/A   | Yes                          |                       |
| 3366       | 8/31/18         | 100                        | 330                     | 656                      | 12                    | 8/31/18                  | 12/20/18          | 111                                         | <40                              | <40                           | 994                            | N/A   | Yes                          |                       |
| 3320       | 6/12/18         | 120                        | 6800                    | 267                      | N/A                   | 12/6/18                  | 8/3/19            | 240                                         | <40                              | <40                           | 310                            | N/A   | Yes                          |                       |
| 3452       | 12/29/18        | 27                         | 910                     | 574                      | 6                     | 1/1/19                   | 9/23/19           | 265                                         | <40                              | <40                           | 938                            | N/A   | Yes                          |                       |
| 1024       | 4/23/14         | 48                         | 3403                    | 615                      | 57                    | 4/24/14                  | N/A               | N/A                                         | N/A                              | N/A                           | N/A                            | N/A   | Yes                          | No CSF at follow up   |
| 4947       | 12/20/13        | 92                         | 912                     | 797                      | 52                    | 2/28/14                  | N/A               | N/A                                         | N/A                              | N/A                           | N/A                            | N/A   | Yes                          | No CSF at follow up   |
| 5168       | 5/22/08         | 118                        | 3230                    | 660                      | 9                     | 3/30/10                  | 4/29/10           | 30                                          | <40                              | N/A                           | 650                            | N/A   | Yes                          | No CSF at follow up   |
| 3164       | 11/21/17        | 220                        | 2700                    | 194                      | 12                    | N/A                      | N/A               | N/A                                         | 470                              | NA                            | 255                            | N/A   | Yes                          | No CSF at follow up   |
| 3245       | 4/20/18         | 39                         | 290                     | 578                      | 17                    | N/A                      | N/A               | N/A                                         | <40                              | NA                            | NA                             | N/A   | Yes                          | No CSF at follow up   |
| 3328       | 3/8/18          | 290                        | 6900                    | 412                      | 15                    | N/A                      | N/A               | N/A                                         | <40                              | NA                            | NA                             | N/A   | Yes                          | No CSF at follow up   |
| 1481       | 2/25/19         | 62                         | 620                     | 427                      | 12                    | N/A                      | N/A               | N/A                                         | <40                              | NA                            | 421                            | N/A   | Yes                          | No CSF at follow up   |

Supplemental Table 4. Mann-Whitney p values from Figure 5B

| <b>Biomarker</b> | <b>p values</b>                   |                                    |                                            |
|------------------|-----------------------------------|------------------------------------|--------------------------------------------|
|                  | <b>Lower diversity vs control</b> | <b>Higher diversity vs control</b> | <b>Lower diversity vs higher diversity</b> |
| CD27             | < 0.0001                          | < 0.0001                           | 0.1903                                     |
| MXB1             | < 0.0001                          | < 0.0001                           | 0.4363                                     |
| CD79b            | < 0.0001                          | < 0.0001                           | 0.2973                                     |
| IFNg             | < 0.0001                          | < 0.0001                           | 0.3865                                     |
| MMP9             | < 0.0001                          | < 0.0001                           | 0.4363                                     |
| CD48             | < 0.0001                          | < 0.0001                           | 0.1615                                     |
| TNFS14           | < 0.0001                          | < 0.0001                           | 0.8633                                     |
| LTA              | < 0.0001                          | < 0.0001                           | 0.2973                                     |
| FASLG            | < 0.0001                          | < 0.0001                           | 0.1615                                     |
| CHI3L1           | < 0.0001                          | < 0.0001                           | 0.0939                                     |

## Supplemental Table 5. Primer sequences

| Primer                               | Sequence                                                                       | HXB2 numbers<br>for gene specific<br>primer regions |
|--------------------------------------|--------------------------------------------------------------------------------|-----------------------------------------------------|
| SGA1 Forward                         | GGGTTTATTACAGGGACAGCAGAG                                                       | 4900-4923                                           |
| SGA1 Reverse                         | GCACTCAAGGCAAGCTTTATTGAGGCTTA                                                  | 9632-9604                                           |
| SGA2 Forward                         | CACCGGCTTAGGCATCTCCTATACCAGGAAGAA                                              | 5954-5982                                           |
| SGA2 Reverse                         | CTGCCAATCAGGGAAGTAGCCTTGTGT                                                    | 9171-9145                                           |
| MiSeq Subtype B V3 cDNA <sup>A</sup> | GTGACTGGAGTTCAGACGTGTGCTCTTCCGATCTNNNNNNNNNNNCAGTCCATTTTGCTYAYTRABVTTACAATRTGC | 7238-7209                                           |
| MiSeq Subtype C V3 cDNA <sup>A</sup> | GTGACTGGAGTTCAGACGTGTGCTCTTCCGATCTNNNNNNNNNGCTATGTGTTGTAATTTCTAGGTCCCCT        | 7322-7248                                           |
| MiSeq PR cDNA <sup>A</sup>           | GTGACTGGAGTTCAGACGTGTGCTCTTCCGATCTNNNNNNNNNCAGTTTAACTTTTGGGCCATCCATTCC         | 2614-2592                                           |
| MiSeq IN cDNA <sup>A</sup>           | GTGACTGGAGTTCAGACGTGTGCTCTTCCGATCTNNNNNNNNNNNATCGAATACTGCCATTTGTAAGTGC         | 4771-4752                                           |
| MiSeq RT cDNA <sup>A</sup>           | GTGACTGGAGTTCAGACGTGTGCTCTTCCGATCTNNNNNNNNNNNCAGTCACTATAGGCTGTACTGTCCATTTATC   | 3284-3258                                           |
| MiSeq V3 PCR1                        | GCCTCCCTCGCGCCATCAGAGATGTGTATAAAGAGACAGNNNNNTTATGGGATCAAAGCCTAAAGCCATGTGTA     | 6555-6584                                           |
| MiSeq PR PCR1                        | GCCTCCCTCGCGCCATCAGAGATGTGTATAAAGAGACAGNNNNNTCAGAGCAGACCAAGCCAACAGCCCCA        | 2136-2163                                           |
| MiSeq IN PCR1                        | GCCTCCCTCGCGCCATCAGAGATGTGTATAAAGAGACAGNNNNAAAAGGAGAAGCCATGCATG                | 4364-4383                                           |
| MiSeq RT PCR1                        | GCCTCCCTCGCGCCATCAGAGATGTGTATAAAGAGACAGNNNNGGCCATTGACAGAAGAAAAATAAAAGC         | 2620-2647                                           |
| MiSeq PCR1 reverse primer            | GTGACTGGAGTTCAGACGTGTGCTC                                                      | N/A                                                 |
| MiSeq PCR2 primer 1                  | AATGATACGGCGACCACCGAGATCTACACGCCTCCCTCGCGCCATCAGAGATGTG                        | N/A                                                 |
| MiSeq PCR2 primer 2 <sup>B</sup>     | CAAGCAGAAGACGGCATACGAGATNNNNNNGTACTGGAGTTCAGACGTGTGCTC                         | N/A                                                 |
| Sequencing primer for<br>MiSeq runs  | GCCTCCCTCGCGCCATCAGAGATGTGTATAAAGAGACAG                                        | N/A                                                 |

<sup>A</sup>Ns in the cDNA primer sequences are random primers

<sup>B</sup>In the index primer the 6-N is not a random primer but a pre-designed index sequence. We use a set of 24 indices

Supplemental Table 6. Sizes of amplicons sequenced

| <b>Sequencing method</b> | <b>Region</b> | <b>HXB2 numbers for sequenced regions</b> |
|--------------------------|---------------|-------------------------------------------|
| SGA/Sanger               | env           | 6325-8794                                 |
| MiSeq                    | V3            | 6585-7208 <sup>A</sup>                    |
| MiSeq                    | PR            | 2164-2593                                 |
| MiSeq                    | IN            | 4384-7517                                 |
| MiSeq                    | RT            | 2648-2914 and 3001-3257 <sup>B</sup>      |

<sup>A</sup>A small segment of C2 is missing

<sup>B</sup>These two sequence fragments were joined together

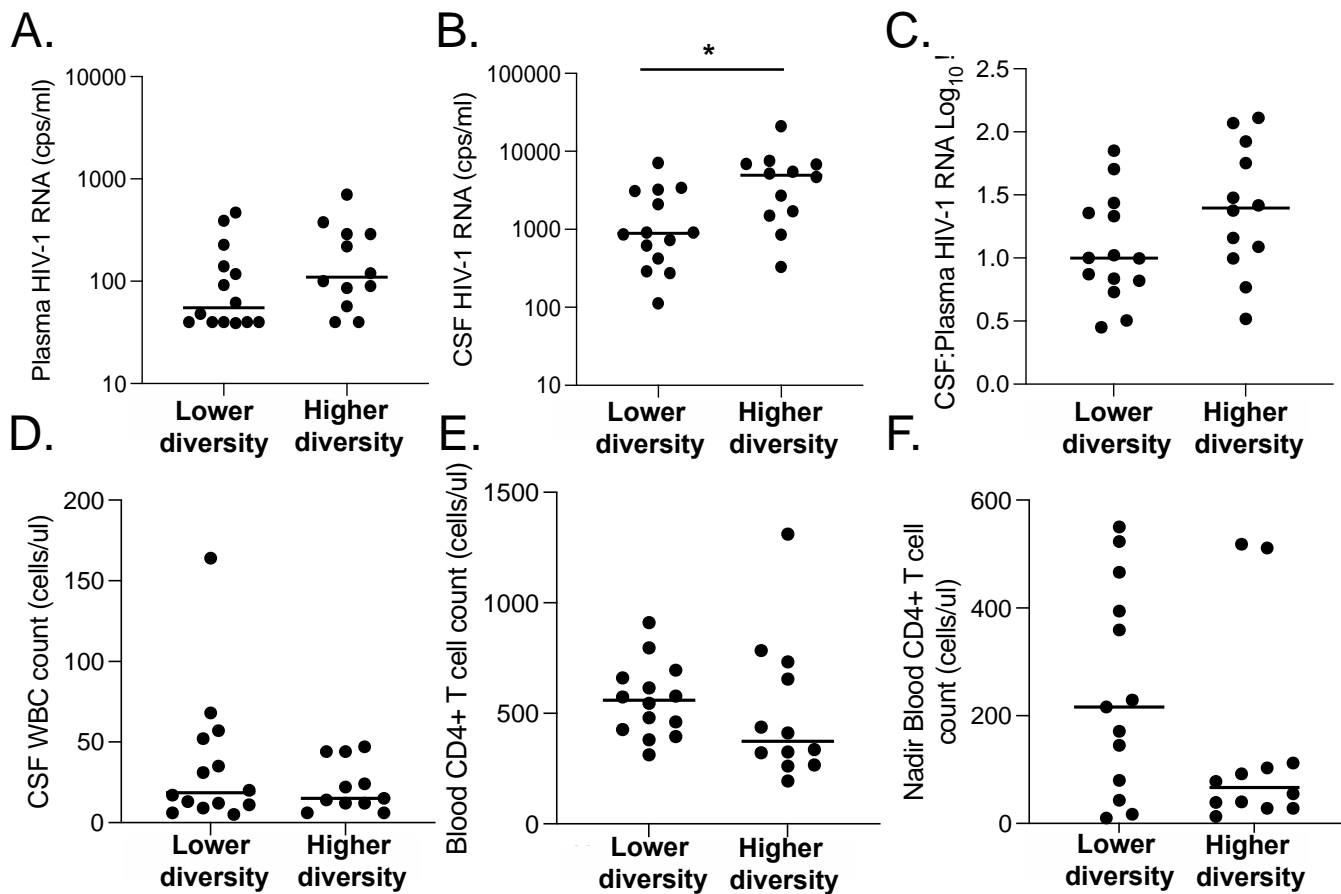

**Supplemental Figure 1. CSF HIV-1 RNA levels are higher in NSE participants with more diverse NSE viral populations.**

Comparisons were done for plasma HIV-1 RNA (A), CSF HIV-1 RNA (B), CSF:plasma HIV-1 RNA  $\log_{10} \Delta$  (C), CSF WBC count (D), blood CD4+ T cell count (E), and nadir blood CD4+ T cell count (F) in the NSE cohort (N = 25). Mann-Whitney tests were performed for all comparisons and found that CSF HIV-1 RNA levels were greater in participants with higher diversity NSE populations (mean PWD above 0.004) than in participants with lower diversity (mean PWD below 0.004) NSE populations ( $p = 0.03$ ). All  $p$  values were corrected for multiple comparisons. Median values are shown with horizontal bars.

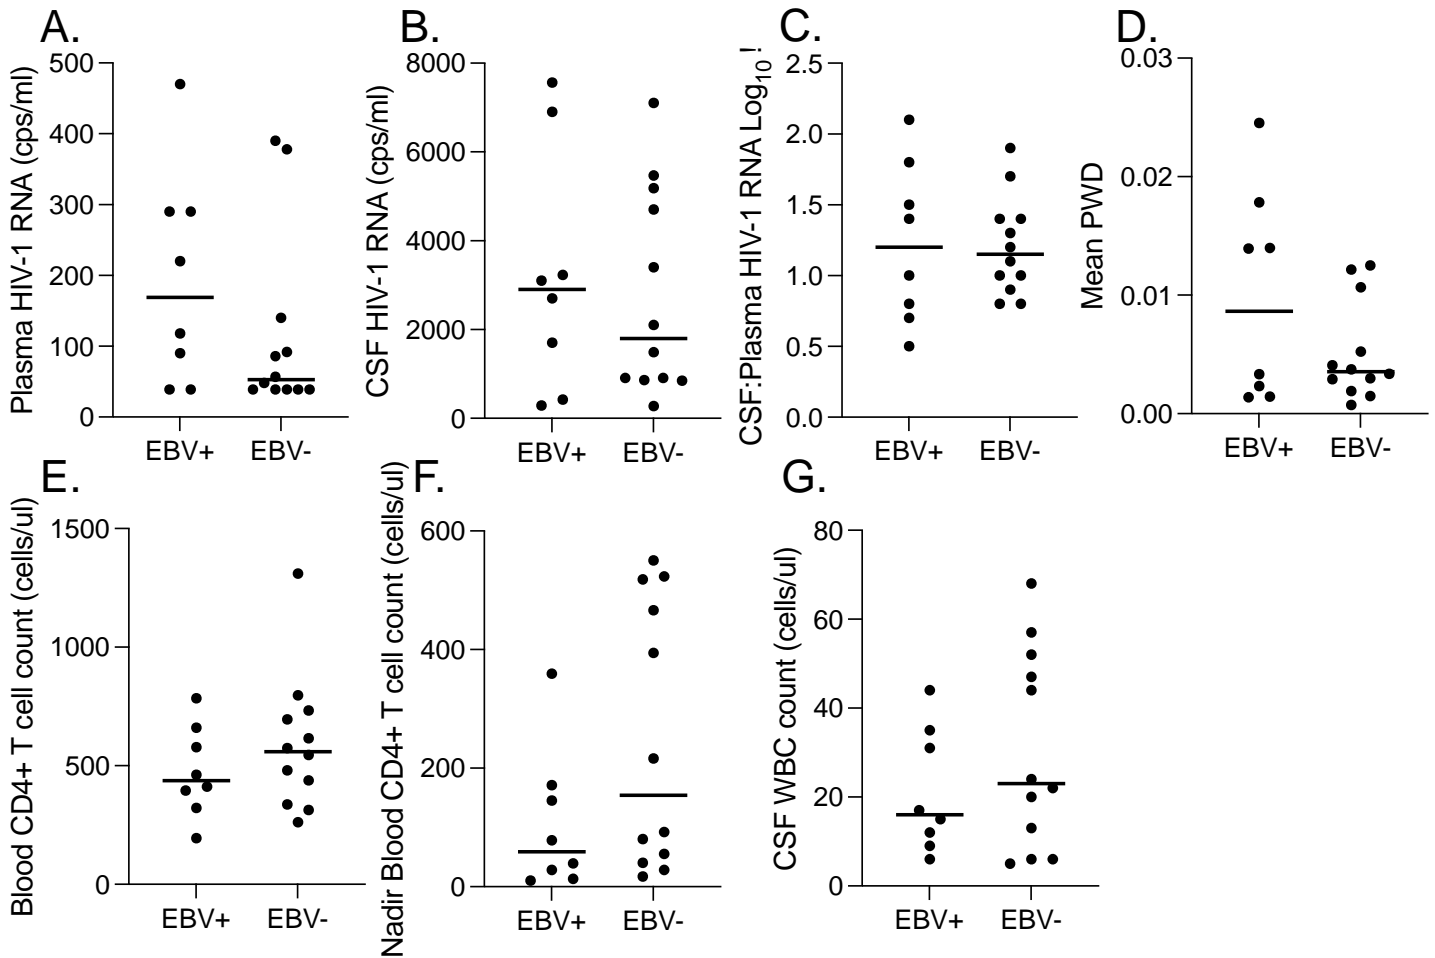

**Supplemental Figure 2. NSE participants do not differ in HIV-1 RNA levels, cell counts, or mean PWD based on the presence of EBV in the CSF.**

A subset of NSE participants were tested for CSF coinfections. The most common pathogen detected was EBV (found in 9/20 participants). We compared plasma HIV-1 RNA (**A**), CSF HIV-1 RNA (**B**), CSF:plasma HIV-1 RNA  $\log_{10} \Delta$  (**C**), mean PWD (**D**), blood CD4+ T cell count (**E**), nadir blood CD4+ T cell count (**F**), and CSF WBC count (**G**) between EBV+ (N = 8) and EBV- (N = 12) participants. Mann Whitney tests found no significant differences in any of these comparisons. All p values were corrected for multiple comparisons. Median values are shown with horizontal bars.



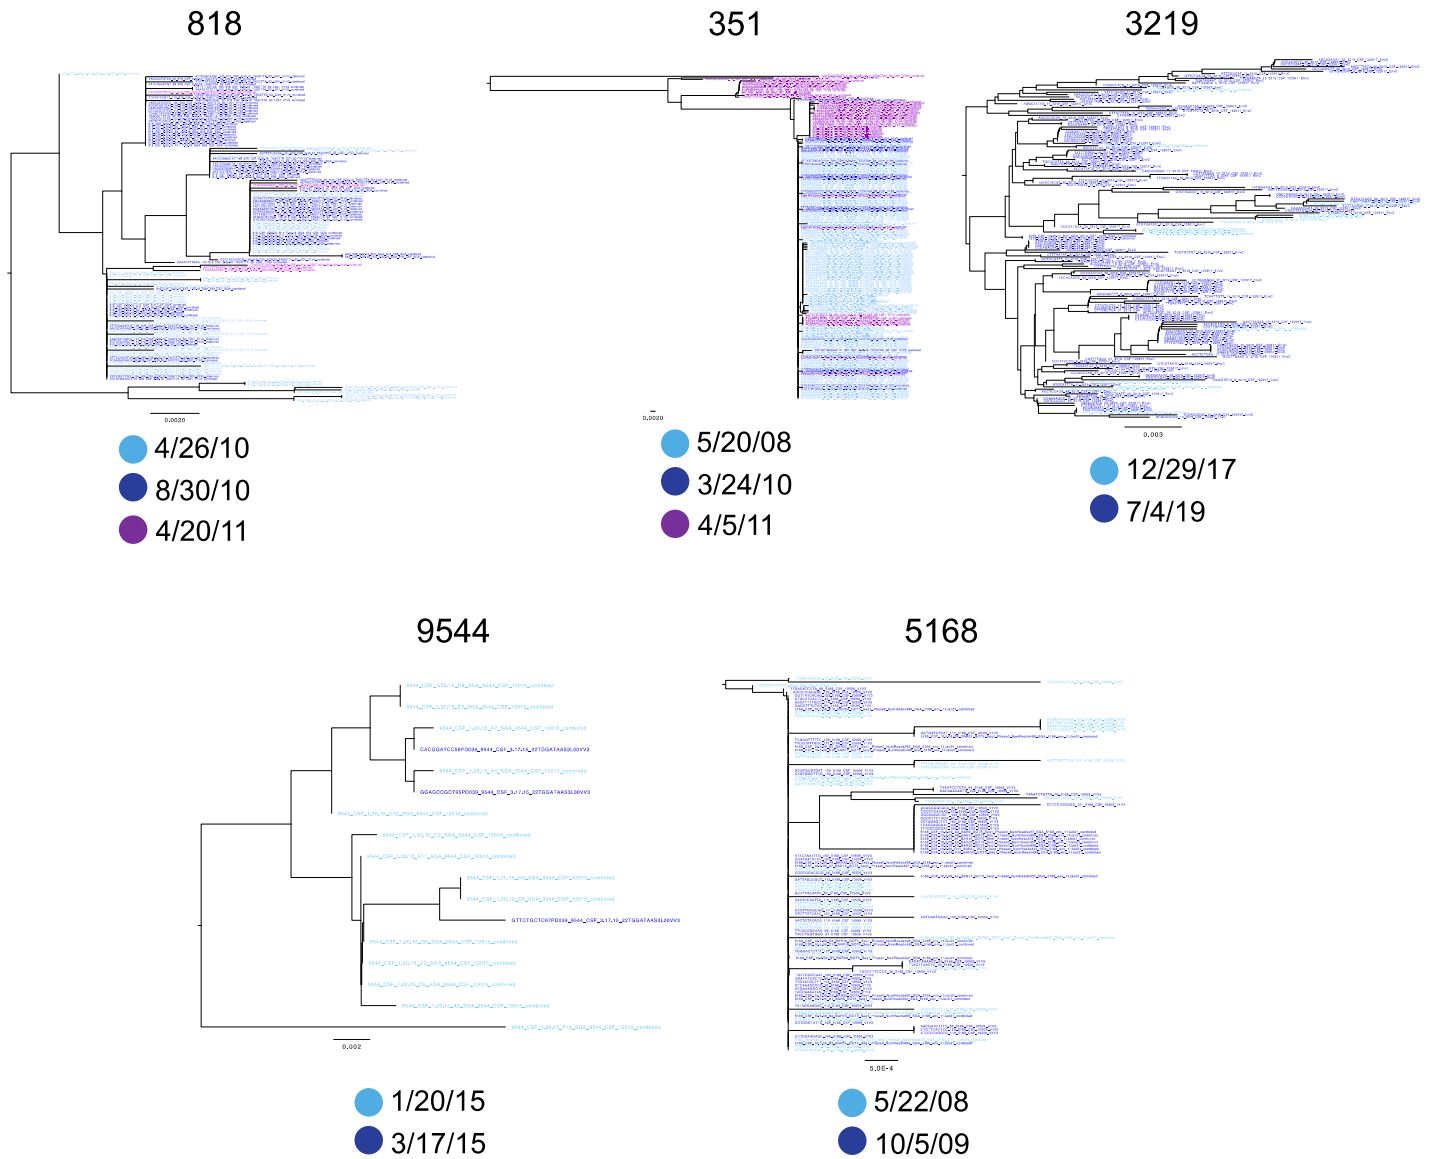

**Supplemental Figure 3. Partial *env* sequences from participants with multiple NSE time points.**

Neighbor-joining phylogenetic trees for participants with multiple NSE timepoints (timepoint 1, light blue; timepoint 2, dark blue; timepoint 3 (if applicable), purple). Sample collection dates are shown. Evidence of ongoing replication and evolution can be seen in participant 351 with the mostly purple lineage at the top of the tree that has diverged from the light and dark blue sequences in the main part of the tree.

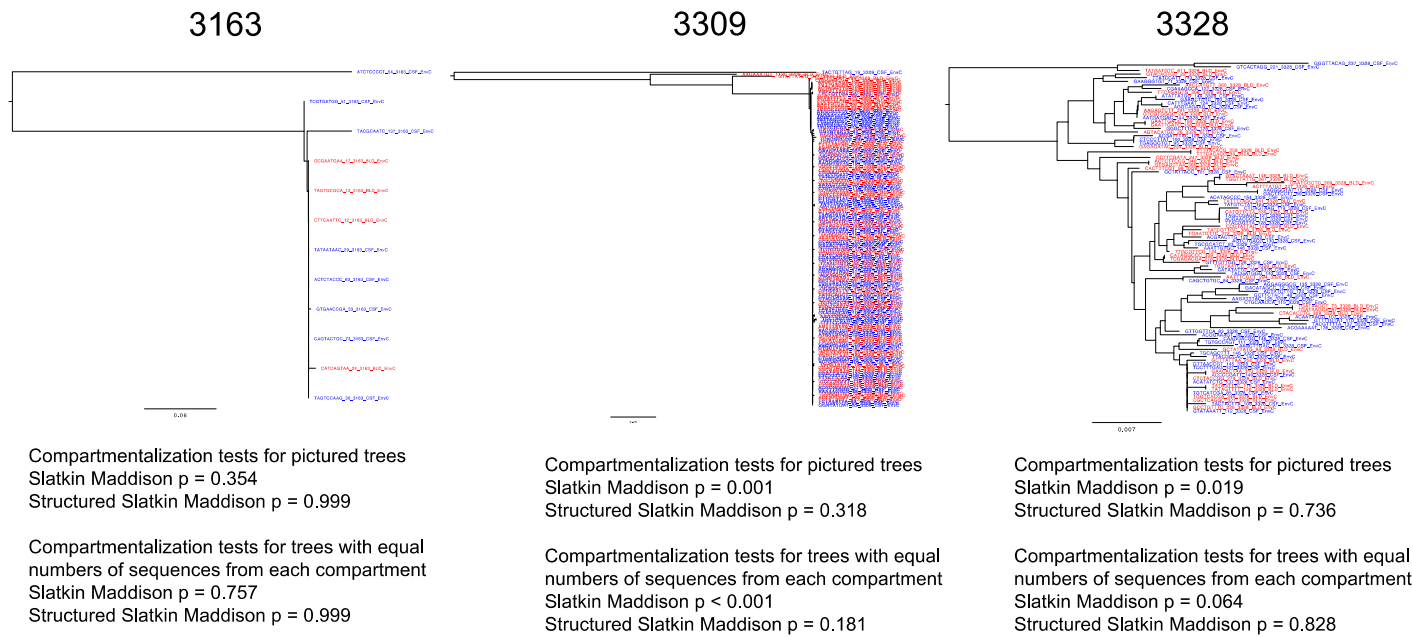

**Supplemental Figure 4. Env sequences from the blood plasma are equilibrated with env sequences from the CSF during NSE.**

Neighbor-joining phylogenetic trees from three representative participants for which we were able to generate blood (red) and CSF (blue) sequences at the time of escape. The trees pictured, as well as trees with equal numbers of blood and CSF sequences (to avoid false positives), were analyzed for compartmentalization (classical Slatkin Maddison and Structured Slatkin Maddison). In all participants, blood and CSF sequences were equilibrated.

## References not in main text

88. Narvid J, et al. Brain MRI Features of CSF Human Immunodeficiency Virus Escape. *J Neuroimaging*. 2018;28(6):601-7.
89. Trunfio M, et al. Symptomatic cerebrospinal fluid HIV-1 escape with no resistance-associated mutations following low-level plasma viremia. *J Neurovirol*. 2018;24(1):132-6.
